# Supplementary material for: Fabrication of novel direct Z-scheme + isotype heterojunction photocatalyst g-C3N4/TiO2 with peroxymonosulfate (PMS) activation synergy and 2D/0D structure
Source: Royal Society of Chemistry journal article supplement (doi:10.1039/d2cy01387h), 2022-01-01

## Supporting Information

# Fabrication of novel direct Z-scheme+isotype heterojunction photocatalyst g-C<sub>3</sub>N<sub>4</sub>/TiO<sub>2</sub> with peroxymonosulfate (PMS) activation synergy and 2D/0D structure

*Bowen Zhang, Mingkun Wu, Zhengjun Chen, Lihui Dong\* and Bin Li\**

<sup>1</sup>a. Guangxi Key Laboratory of Petrochemical Resource Processing and Process Intensification Technology, School of Chemistry and Chemical Engineering, Guangxi University, Nanning 530004, PR China.

### **Corresponding Authors**

\*E-mail: binli@gxu.edu.cn (B.L.), donglh@gxu.edu.cn. (L.D.)

**Fig. S2(f) HRTEM image of TCN-UT.**

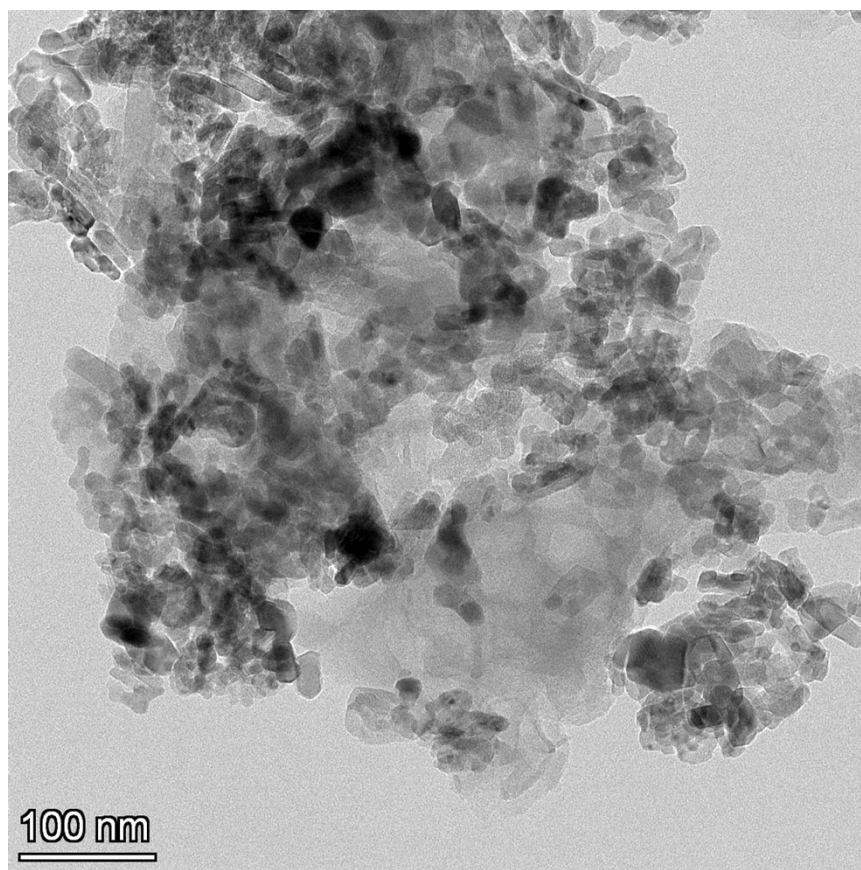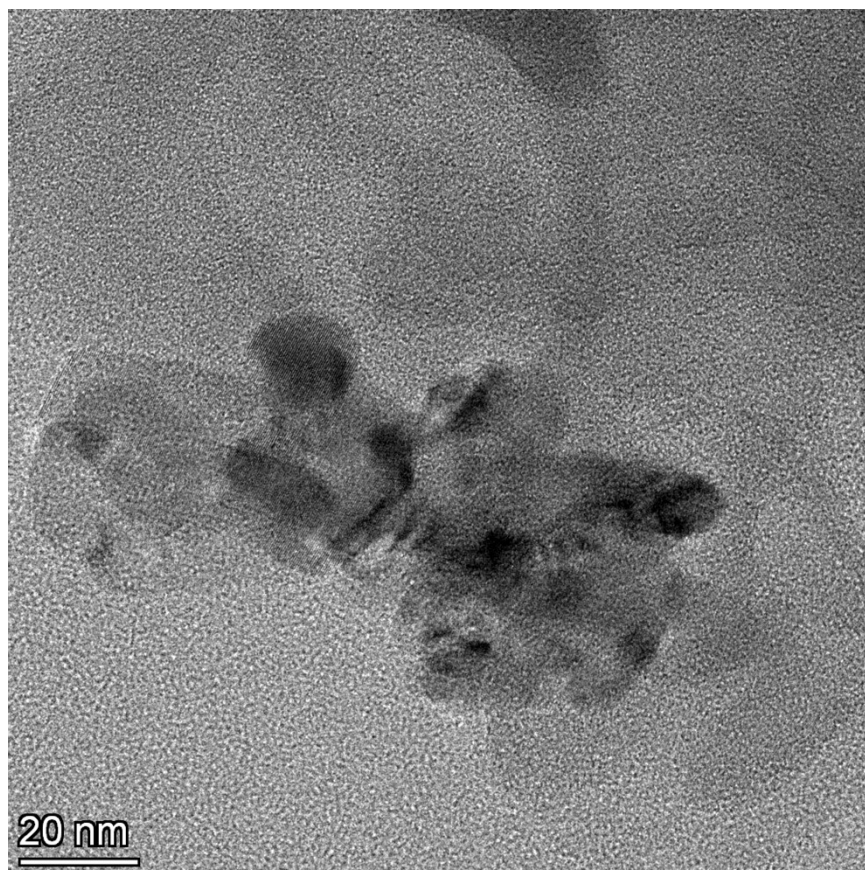

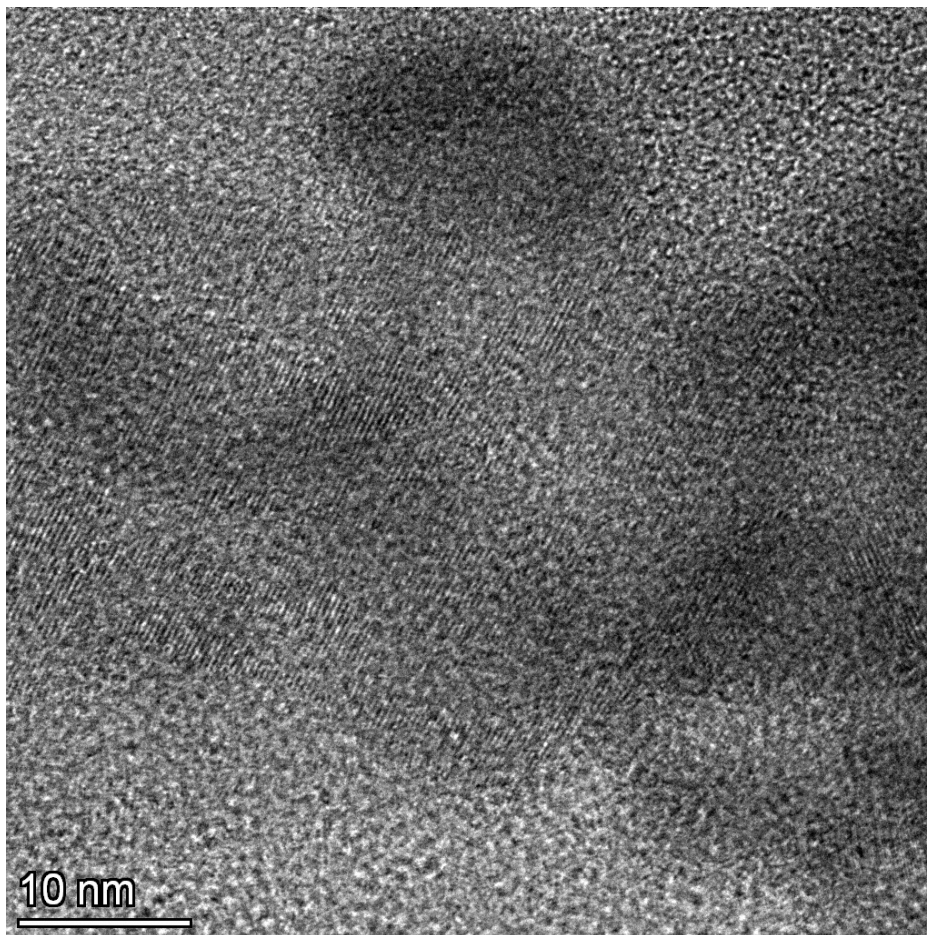

Supplement: d2cy01387h1.pdf [file d2cy01387h1.pdf]
